# Supplementary material for: Mitoapocynin Attenuates Organic Dust Exposure-Induced Neuroinflammation and Sensory-Motor Deficits in a Mouse Model
Source: Frontiers journal article supplement (doi:10.3389/fncel.2022.817046), 2022-04-13
Supplement: Data_Sheet_1.PDF [file Data_Sheet_1.PDF]

## Supplementary Material

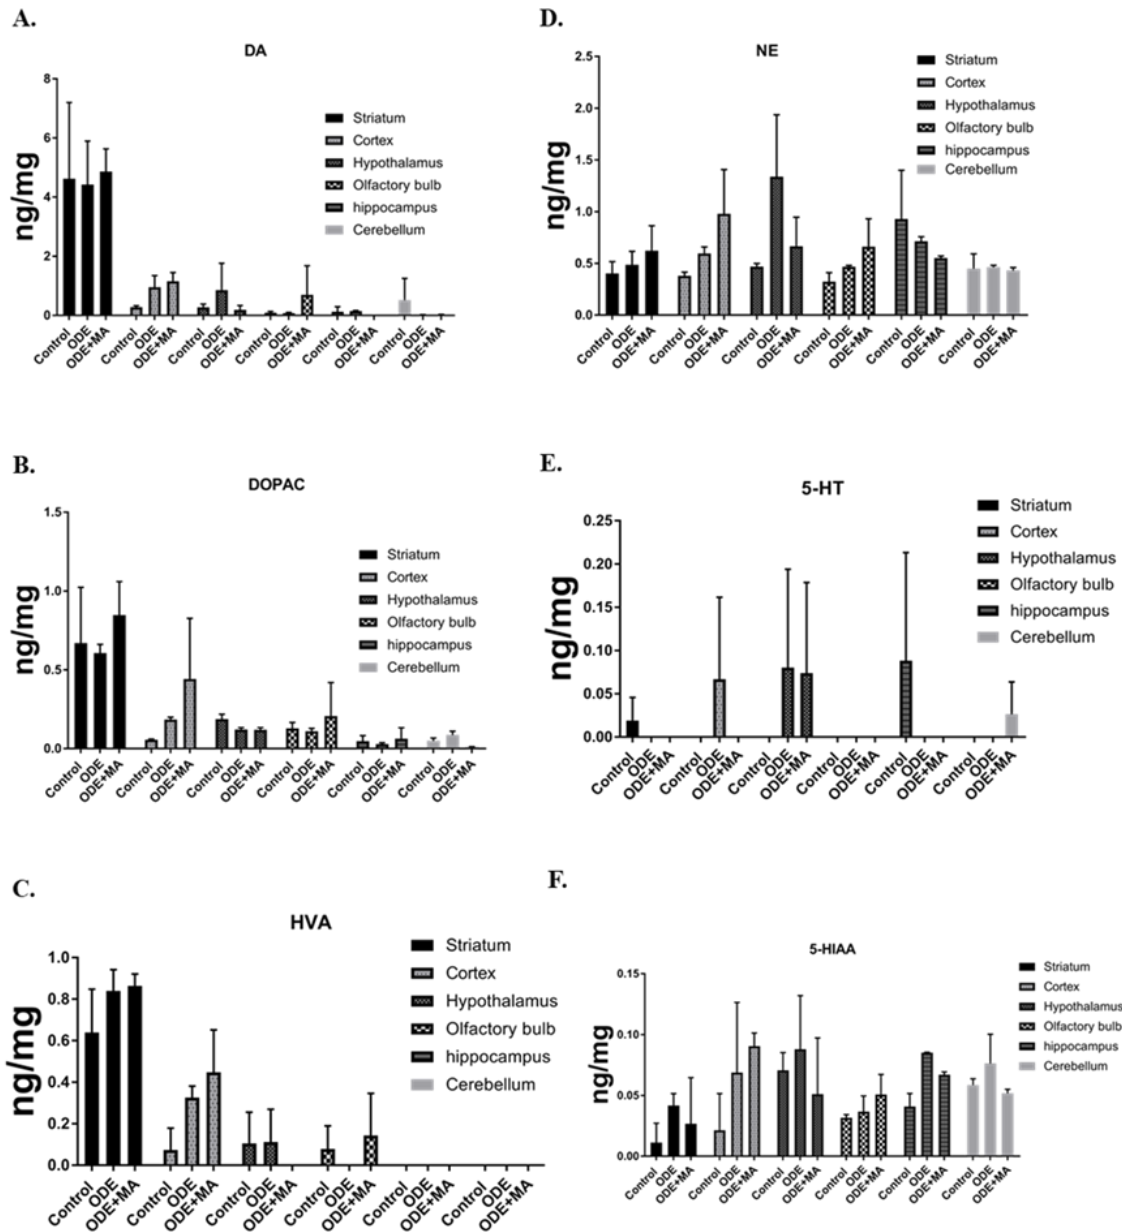

**Supplementary Figure 1.** Neurochemical Profile of control, ODE and ODE + MA exposed mice. Mice exposed to saline, ODE, and ODE with MA (3mg/kg) displayed moderate changes in the brain neurochemical profiles. Norepinephrine (NE) (D), Dopamine (DA) (A), Serotonin (5-HT) (E) and their respective metabolites, Dihydroxyphenylacetic acid (DOPAC) (B), Homovanillic Acid (HVA) (C) and 5-Hydroxyindoleacetic acid (5-HIAA) (F) were measured in various regions including Striatum, pre-frontal cortex, hypothalamus, olfactory bulb, hippocampus and cerebellum by HPLC-ECD.

Supplementary Table 1. Animal Treatments

| <b>Treatment group</b>                                                | <b>Route</b>                       | <b>Days</b>              |
|-----------------------------------------------------------------------|------------------------------------|--------------------------|
| Control (Normal Saline, 25 $\mu$ L each nostril)                      | Intranasal                         | Monday to Friday         |
| ODE (12.5 %, 25 $\mu$ L each nostril)                                 | Intranasal                         | Monday to Friday         |
| ODE (12.5 %, 25 $\mu$ L each nostril) + MA (3 mg/Kg) 50 $\mu$ L total | Oral MA followed by Intranasal ODE | Monday/Wednesday /Friday |
| Fluorescent LPS (2 $\mu$ g/ mice)                                     | Intranasal                         | Monday to Friday         |

Supplementary Table 2. Antibodies used in Western blotting

| <b>Antibody</b>              | <b>Catalogue</b> | <b>Dilution</b> | <b>Vendor</b>            |
|------------------------------|------------------|-----------------|--------------------------|
| HMGB1                        | ab 79823         | (1:15000)       | Abcam                    |
| IBA1                         | ab 5076          | (1:500)         | Abcam                    |
| Phospho-Tau (Ser202, Thr205) | MN1020           | (1:1000)        | Thermo Fisher Scientific |

Supplementary Table 3. Antibodies used for ICC

| <b>Primary Target<br/>(Host species)</b> | <b>Catalog #</b> | <b>Secondary Antibody</b>                     | <b>Catalog #</b> |
|------------------------------------------|------------------|-----------------------------------------------|------------------|
| HMGB1 (Rabbit)                           | ab 79823         | Anti-Rabbit (Cy3 conjugated) raised in donkey | 711-165-152      |
| 3-NT (Mouse)                             | ab 61392         | Anti-Mouse (FITC conjugated) raised donkey    | 715-095-150      |

|                                      |         |                                               |             |
|--------------------------------------|---------|-----------------------------------------------|-------------|
| Iba1 (Goat)                          | ab 5076 | Anti-Goat (Cy3 conjugated) raised donkey      | 711-165-147 |
| GFAP (Mouse)                         | G3893   | Anti-Mouse (FITC conjugated) raised donkey    | 715-095-150 |
| Phospho-Tau (Ser202, Thr205) (Mouse) | MN1020  | Anti-Mouse (FITC conjugated) raised donkey    | 715-095-150 |
| NueN (Rabbit)                        | ABN78   | Anti-Rabbit (Cy3 conjugated) raised in donkey | 711-165-150 |
| Acetylated $\alpha$ tubulin(Mouse)   | Ab24610 | Anti-Mouse (Cy3 conjugated) raised in donkey  | 711-165-150 |

Supplementary Table 4 Symbols (Asterisk or Hashtag) and Corresponding p-Values

| Symbol       | p-value      |
|--------------|--------------|
| * or #       | $\leq .05$   |
| ** or ##     | $\leq .01$   |
| *** or ###   | $\leq .001$  |
| **** or #### | $\leq .0001$ |
